# Supplementary material for: Anti-sense DNA d(GGCCCC)n expansions in C9ORF72 form i-motifs and protonated hairpins
Source: PubMed Central journal article supplement (PMC4668579; doi:10.1038/srep17944), 2015-12-03
Supplement: srep17944-s1.pdf [file srep17944-s1.pdf]

## Supplementary Information

### Anti-sense DNA d(GGCCCC)<sub>n</sub> expansions in C9ORF72 form i-motifs and protonated hairpins

Anja Kovanda <sup>1,‡</sup>, Matja Zalar <sup>2,‡</sup>, Primož Šket <sup>2,3</sup>, Janez Plavec <sup>2,3,4\*</sup> & Boris Rogelj <sup>1,5\*</sup>

<sup>1</sup> Department of Biotechnology, Jožef Stefan Institute, Jamova 39, SI-1000 Ljubljana, Slovenia.

<sup>2</sup> Slovenian NMR Centre, National Institute of Chemistry, Hajdrihova 19, SI-1000 Ljubljana, Slovenia.

<sup>3</sup> EN-FIST Center of Excellence, Trg OF 13, SI-1000 Ljubljana, Slovenia.

<sup>4</sup> Faculty of Chemistry and Chemical Technology, University of Ljubljana, Večna pot 113, SI-1000 Ljubljana, Slovenia.

<sup>5</sup> Biomedical Research Institute BRIS, Puhova 10, SI-1000 Ljubljana, Slovenia.

\* Corresponding authors: Janez Plavec ([janez.plavec@ki.si](mailto:janez.plavec@ki.si)) or Boris Rogelj ([boris.rogelj@ijs.si](mailto:boris.rogelj@ijs.si))

‡ These authors contributed equally to this work.

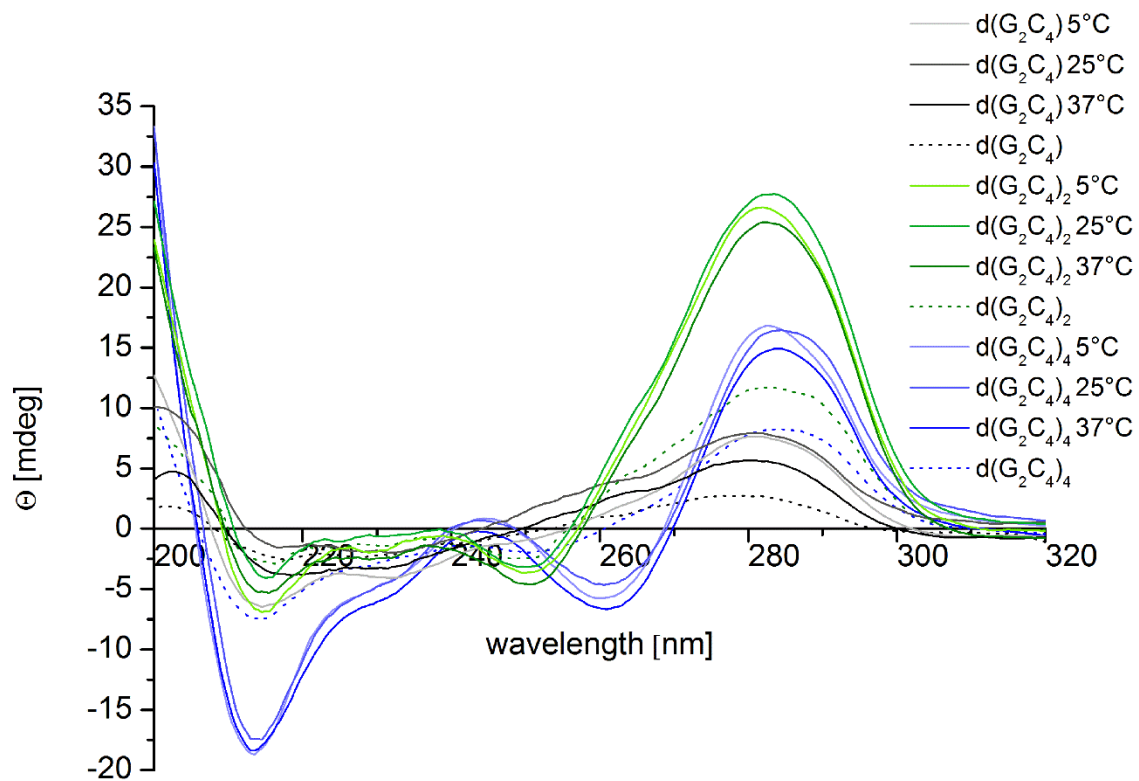

**Supplementary Fig. 1.** CD spectra of  $d(G_2C_4)$  (black),  $d(G_2C_4)_2$  (green), and  $d(G_2C_4)_4$  (blue) immediately after dilution in  $H_2O$  (dotted lines) and after incubation (full lines) at 5, 25, and 37 °C.

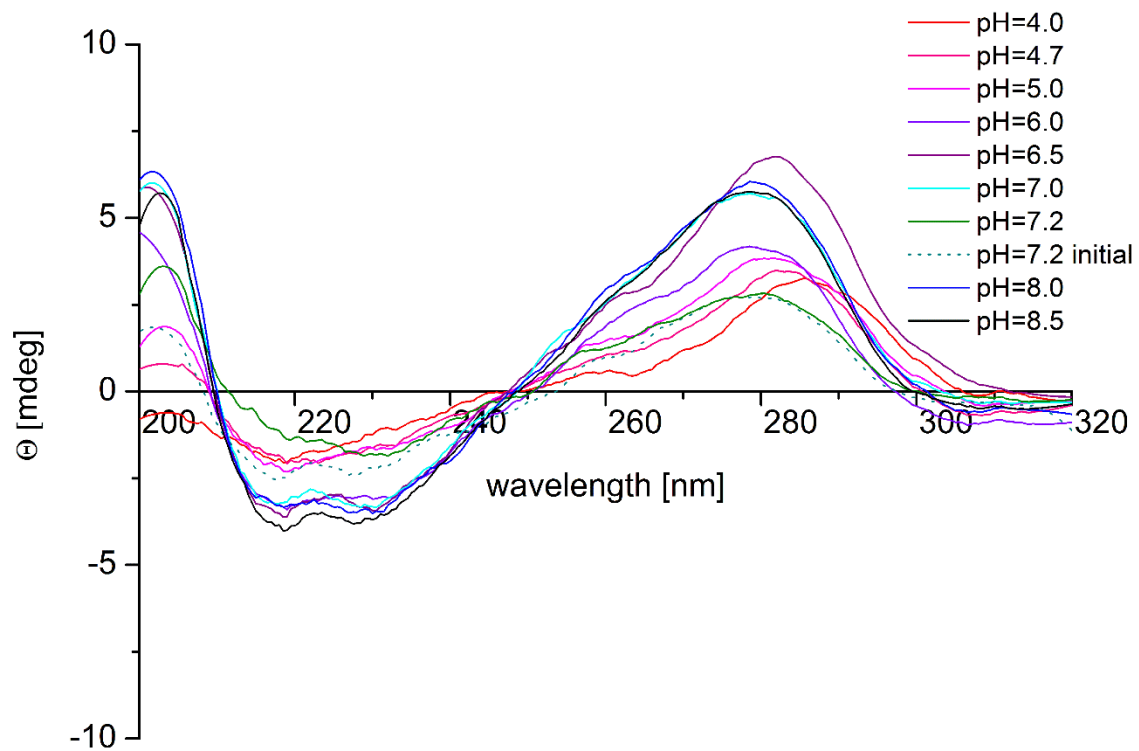

**Supplementary Fig. 2.** CD spectra of d(G<sub>2</sub>C<sub>4</sub>) at different pH values in H<sub>2</sub>O at 37 °C.

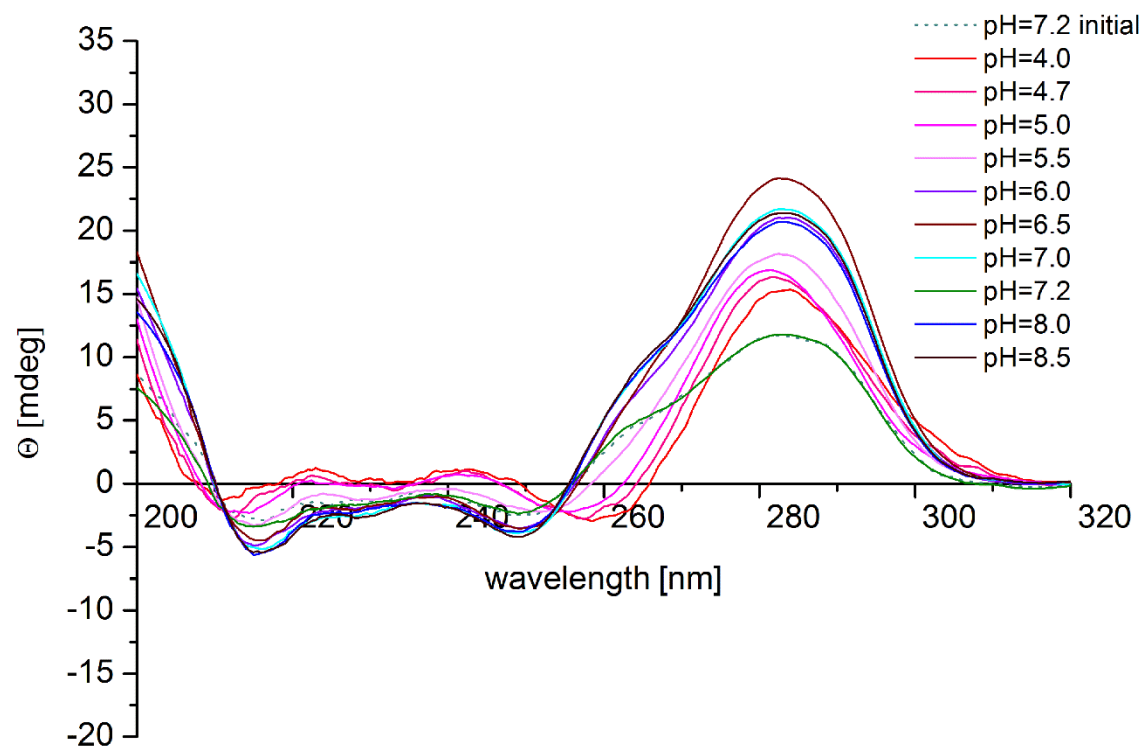

**Supplementary Fig. 3.** CD spectra of  $d(G_2C_4)_2$  at different pH values in  $H_2O$  at  $37\text{ }^\circ\text{C}$ .

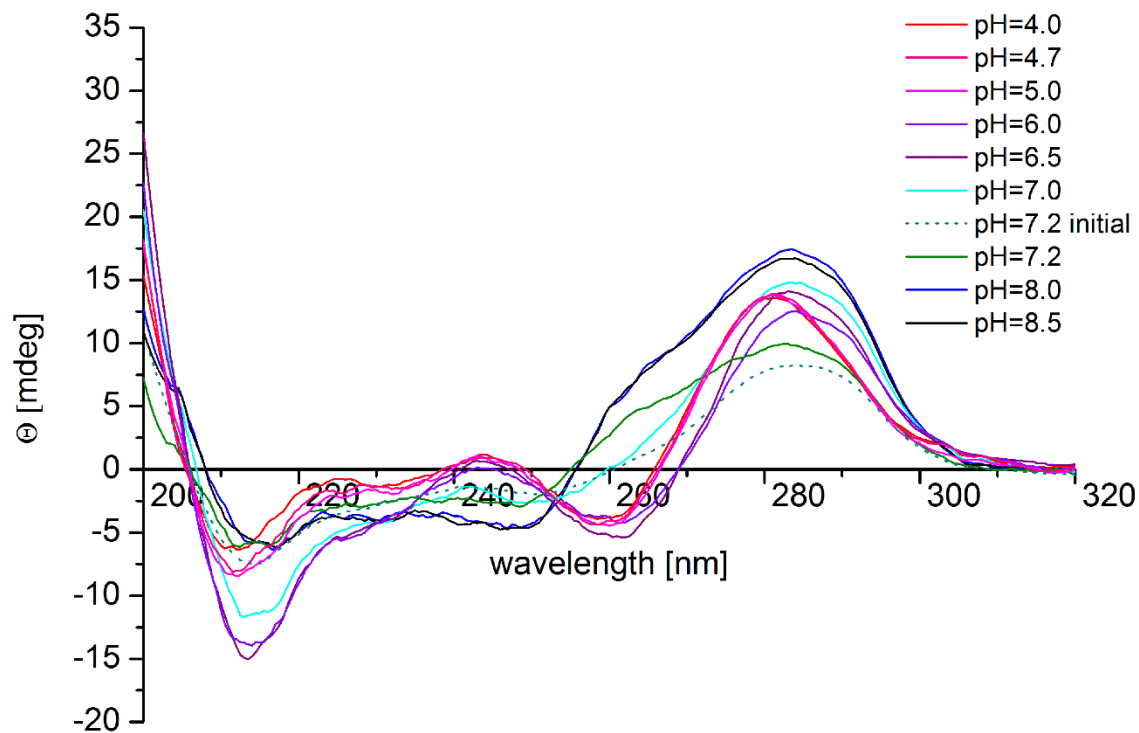

**Supplementary Fig. 4.** CD spectra of d(G<sub>2</sub>C<sub>4</sub>)<sub>4</sub> at different pH values in H<sub>2</sub>O at 37 °C.

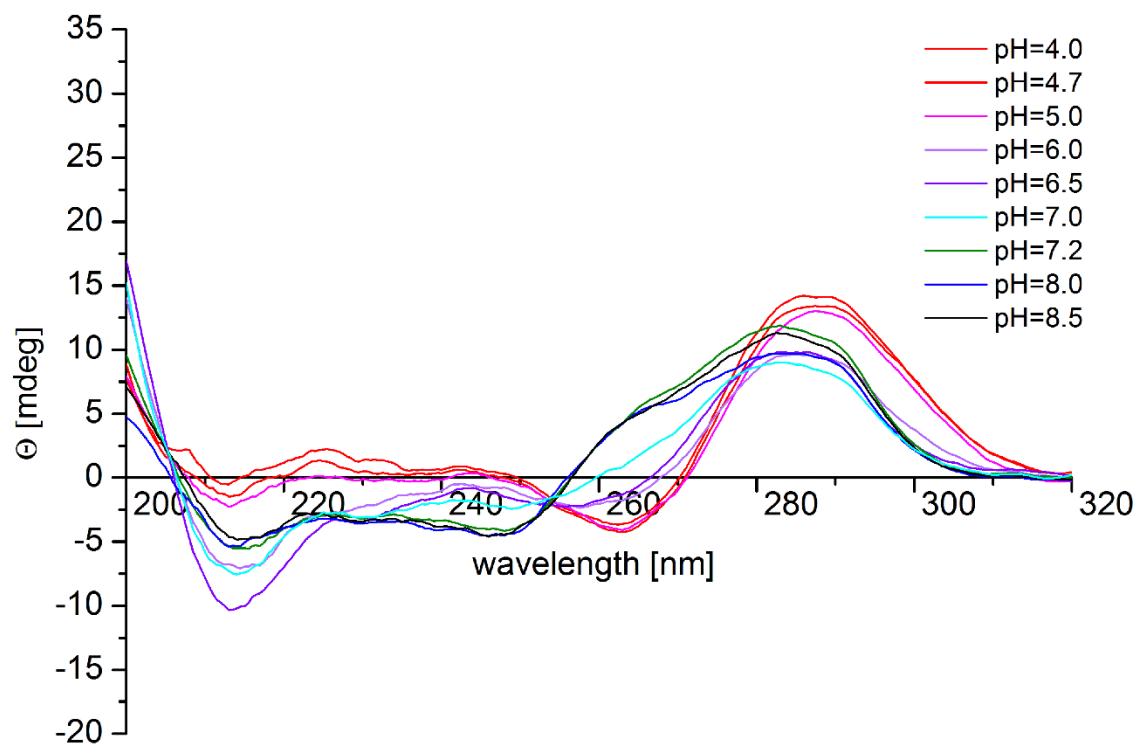

**Supplementary Fig. 5.** CD spectra of d(G<sub>2</sub>C<sub>4</sub>)<sub>8</sub> at different pH values in H<sub>2</sub>O at 37 °C

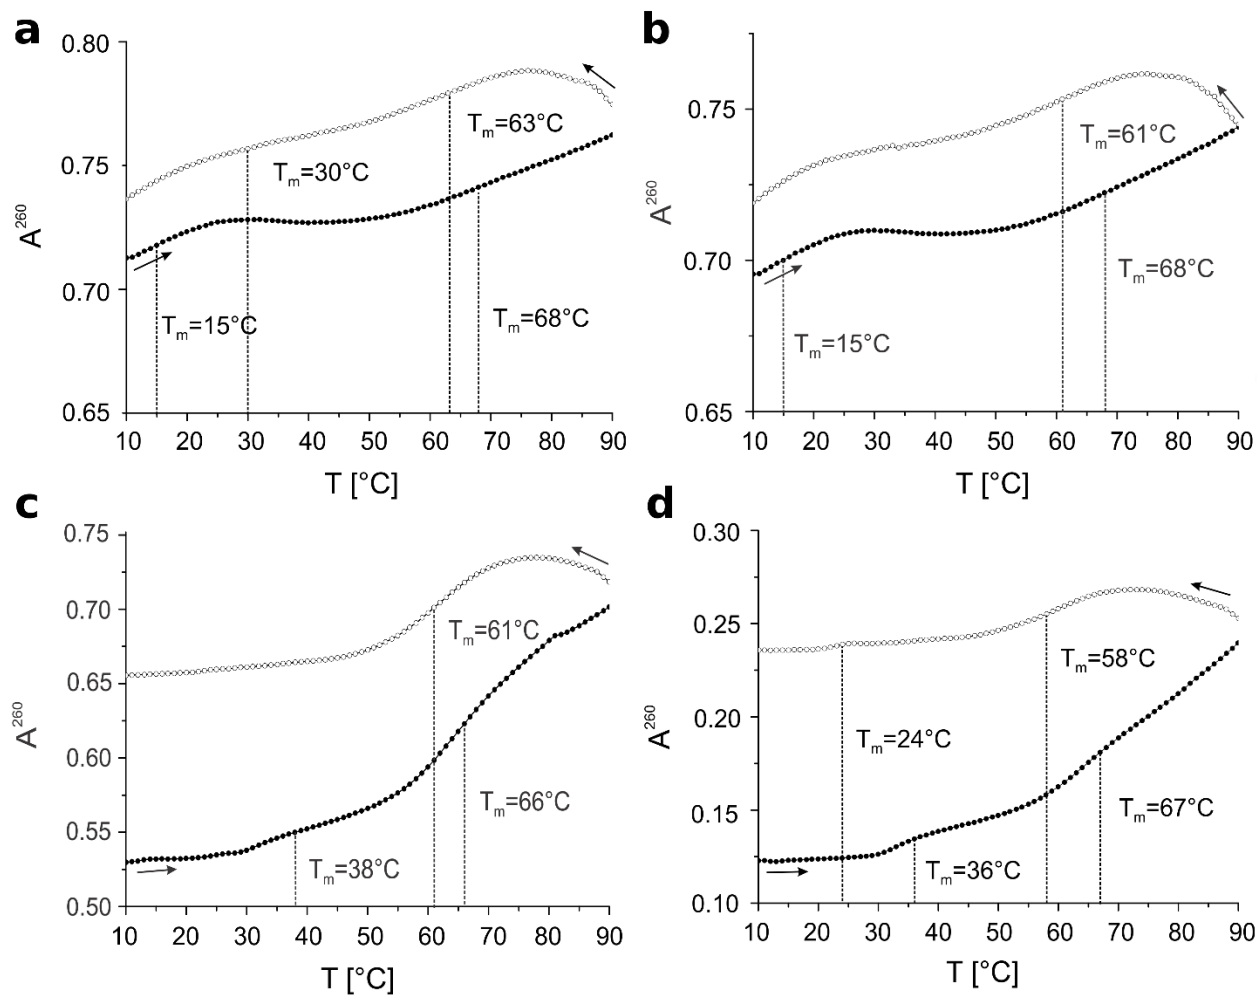

**Supplementary Fig. 6.** **a**, UV melting curves of  $d(G_2C_4)$ , **b**,  $d(G_2C_4)_2$ , **c**,  $d(G_2C_4)_4$ , **d**, and  $d(G_2C_4)_8$  in 100 mM  $K^+$ -phosphate buffer at pH 6.0. For oligonucleotides  $d(G_2C_4)$  and  $d(G_2C_4)_8$ , two transitions have been observed upon both heating and cooling, while  $d(G_2C_4)_2$  and  $d(G_2C_4)_4$  exhibited a single transition upon cooling in contrast to two transitions occurring upon heating. In all cases, upon heating the first transition occurred below 40 °C, which was followed by the second one at around 67 °C. It is noteworthy that processes of unfolding and refolding may proceed through different intermediates. Importantly,  $T_{1/2}$  values are reproducible upon repetition of heating and cooling cycles. Observed multiple transitions indicate presence of different structures in solution.

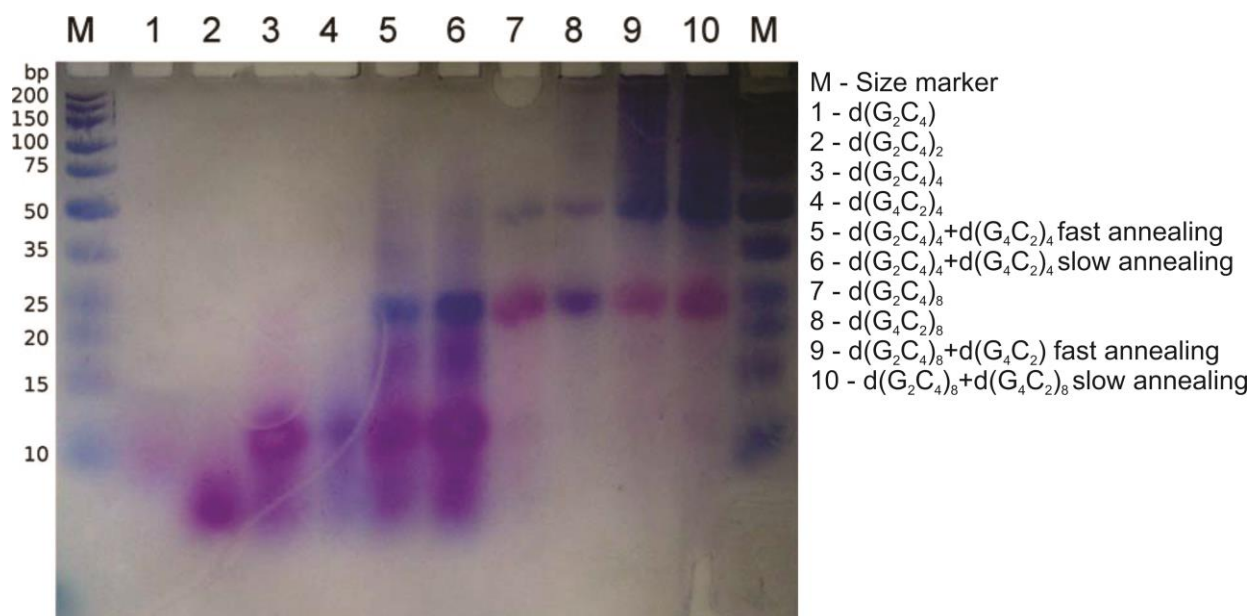

**Supplementary Fig. 7.** Native PAGE electrophoresis of d(G<sub>2</sub>C<sub>4</sub>) (lane 1), d(G<sub>2</sub>C<sub>4</sub>)<sub>2</sub> (lane 2), d(G<sub>2</sub>C<sub>4</sub>)<sub>4</sub> (lane 3), d(G<sub>4</sub>C<sub>2</sub>)<sub>4</sub> (lane 4), equimolar mixture of d(G<sub>2</sub>C<sub>4</sub>)<sub>4</sub> and d(G<sub>4</sub>C<sub>2</sub>)<sub>4</sub> cooled immediately (lane 5) or slowly (lane 6), d(G<sub>2</sub>C<sub>4</sub>)<sub>8</sub> (lane 7), d(G<sub>4</sub>C<sub>2</sub>)<sub>8</sub> (lane 8), equimolar mixture of d(G<sub>2</sub>C<sub>4</sub>)<sub>8</sub> and d(G<sub>4</sub>C<sub>2</sub>)<sub>8</sub> cooled immediately (lane 9) or cooled slowly (lane 10) at pH 6.5. Thermo Scientific GeneRuler Ultra Low range DNA Ladder was used as a size marker (M). The d(G<sub>2</sub>C<sub>4</sub>) traveled to just under the 10-bp marker band (lane 1), suggesting that the single repeat unit forms inter-molecular structures. The d(G<sub>2</sub>C<sub>4</sub>)<sub>2</sub> (lane 2) traveled further suggesting it forms an intra-molecular hairpin species. d(G<sub>2</sub>C<sub>4</sub>)<sub>4</sub> and the sense d(G<sub>4</sub>C<sub>2</sub>)<sub>4</sub> travelled in a similar manner between the 10- and 15-bp marker bands with some smearing visible below 10-bp (lanes 3, 4). The main species of d(G<sub>2</sub>C<sub>4</sub>)<sub>4</sub> traveling at approx. 12-bp exhibited similar mobility as the G-quadruplex formed by d(G<sub>4</sub>C<sub>2</sub>)<sub>4</sub>. The additional smearing below 10-bp marker band furthermore suggests that d(G<sub>2</sub>C<sub>4</sub>)<sub>4</sub> also forms a folded hairpin structure. The strand mixing experiments with fast and slow cooling show that in the presence of d(G<sub>2</sub>C<sub>4</sub>)<sub>4</sub> and d(G<sub>4</sub>C<sub>2</sub>)<sub>4</sub> complementary strands, classic double helix 24-bp DNA strand is formed (lanes 5, 6) in addition to intra-molecular structures of both strands, with visible species down to below the 10-bp marker band. Both d(G<sub>2</sub>C<sub>4</sub>)<sub>8</sub> and d(G<sub>4</sub>C<sub>2</sub>)<sub>8</sub> showed bands at 48-bp as well as between the 20- and 25-bp marker bands (lanes 7, 8). The latter, faster mobility species of d(G<sub>2</sub>C<sub>4</sub>)<sub>8</sub> and d(G<sub>4</sub>C<sub>2</sub>)<sub>8</sub> probably consist of i-motifs and G-quadruplexes, respectively while the slower mobility species could represent homo-duplexes. In the case of d(G<sub>2</sub>C<sub>4</sub>)<sub>8</sub> and d(G<sub>4</sub>C<sub>2</sub>)<sub>8</sub> mixing experiment, the expected 48-bp duplex is visible in addition to species between the 20- and 25-bp marker bands, associated with the presence of intra-molecular single-stranded structures (lanes 9, 10).



**Supplementary Table 1.** Temperatures of half-transition in UV melting experiments

|                                                  | <b>T<sub>1/2</sub> (heating) [°C]</b> |    | <b>T<sub>1/2</sub> (cooling) [°C]</b> |    |
|--------------------------------------------------|---------------------------------------|----|---------------------------------------|----|
| <b>d(G<sub>2</sub>C<sub>4</sub>)</b>             | 15                                    | 68 | 63                                    | 30 |
| <b>d(G<sub>2</sub>C<sub>4</sub>)<sub>2</sub></b> | 15                                    | 68 | 61                                    |    |
| <b>d(G<sub>2</sub>C<sub>4</sub>)<sub>4</sub></b> | 38                                    | 66 | 61                                    |    |
| <b>d(G<sub>2</sub>C<sub>4</sub>)<sub>8</sub></b> | 36                                    | 67 | 58                                    | 24 |
